# Supplementary material for: SF3B1 hotspot mutations confer sensitivity to PARP inhibition by eliciting a defective replication stress response
Source: PubMed Central journal article supplement (PMC10412459; doi:10.1038/s41588-023-01460-5), 2023-07-31

# Source Data- Uncropped scans with size markers

MEL202<sup>R625G</sup> labelled as C37 in some blots

MEL202<sup>R625G</sup> labelled as MEL202 in some blots

Extended Data Fig. 1f

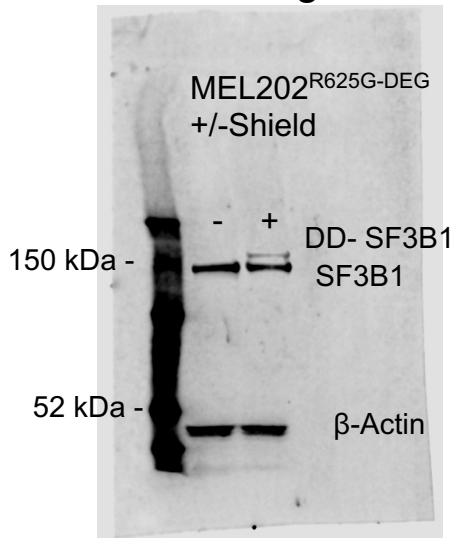

Extended Data Fig. 1j

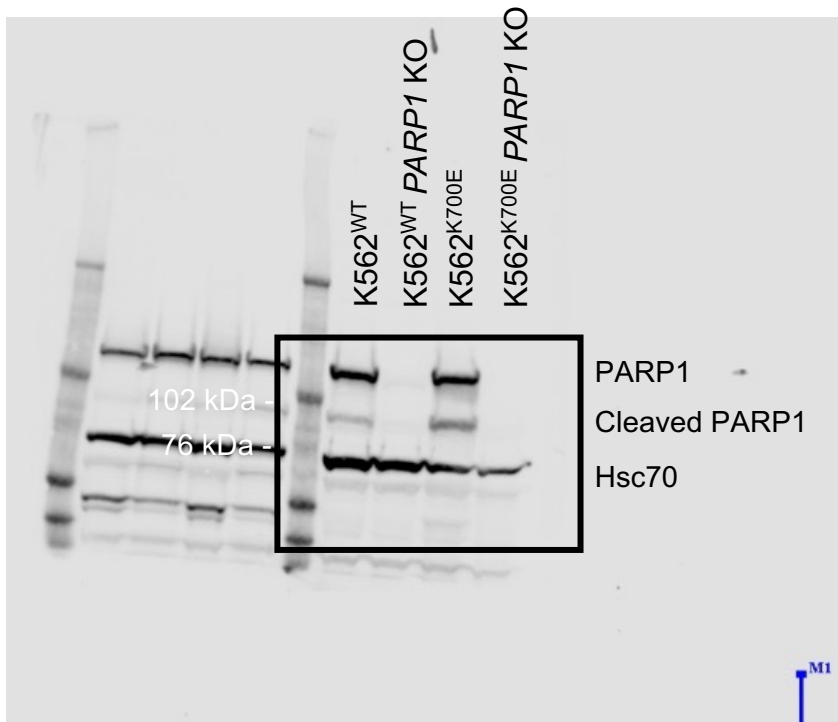

Extended Data Fig. 2e

SF3B1

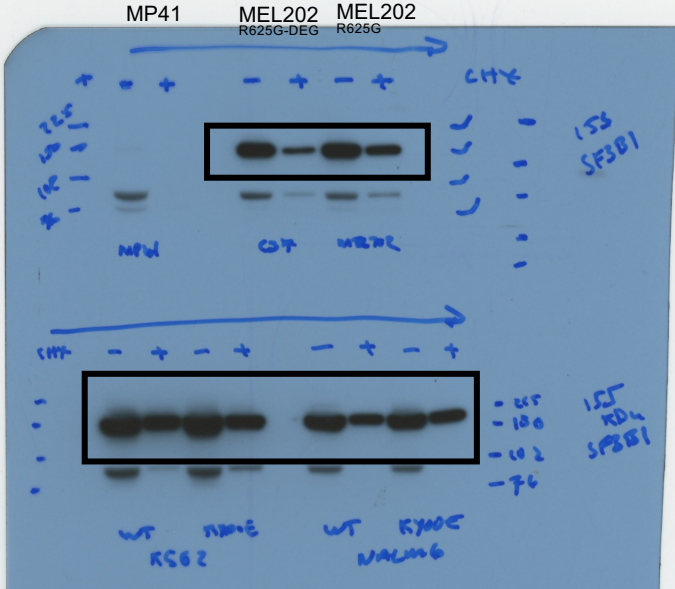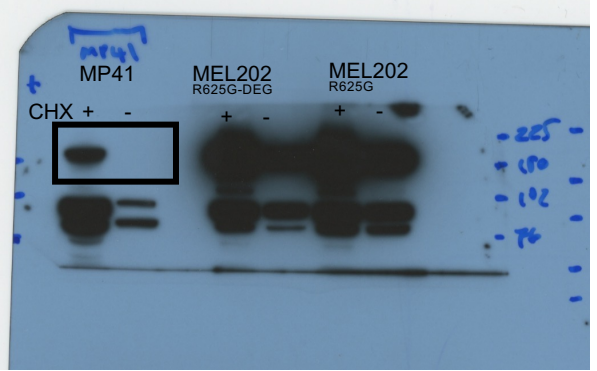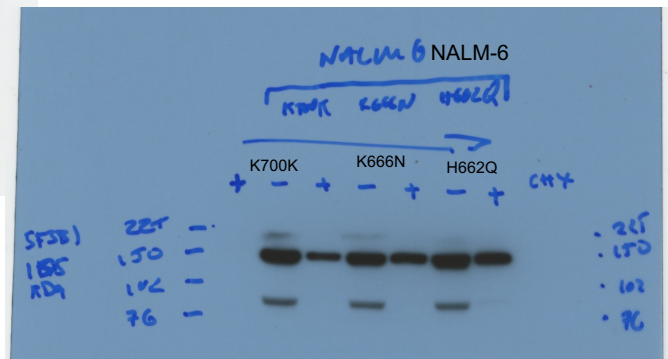

CCND1

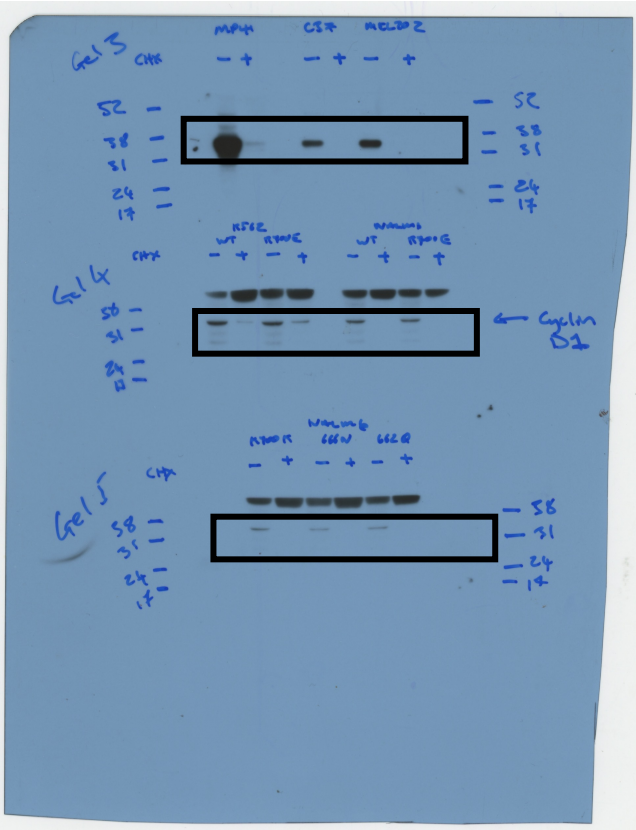

$\beta$ -actin

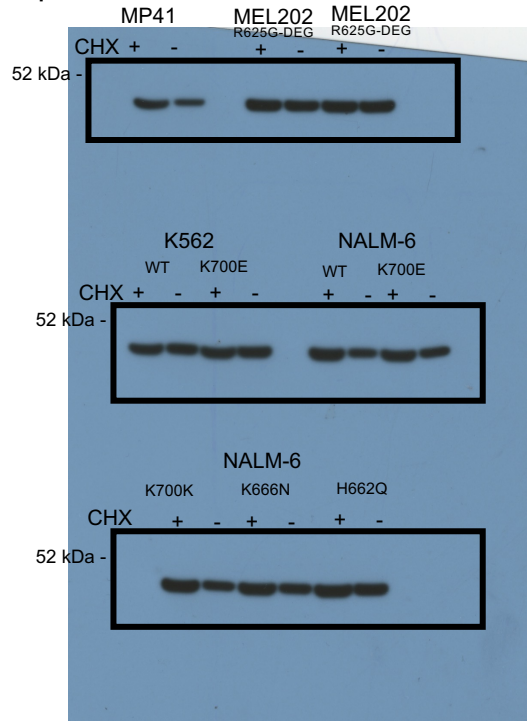

Extended Data Fig. 3e

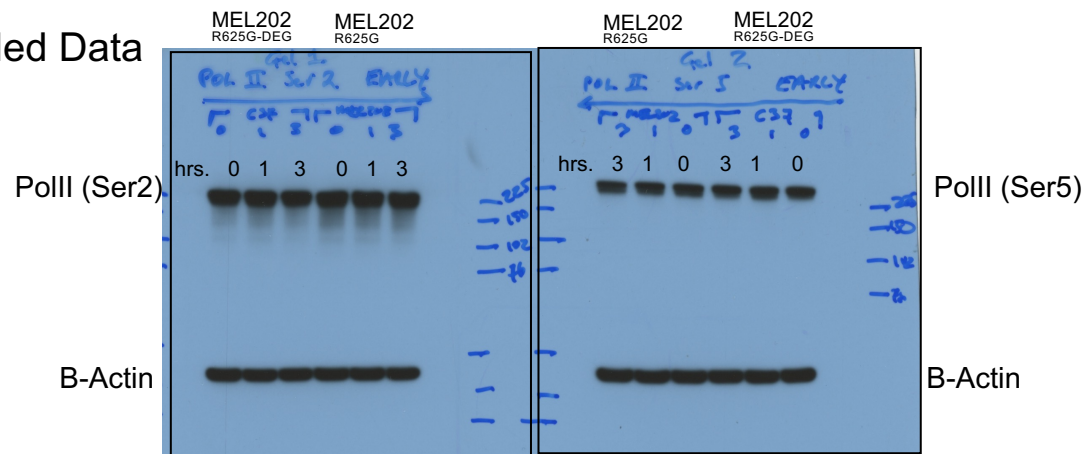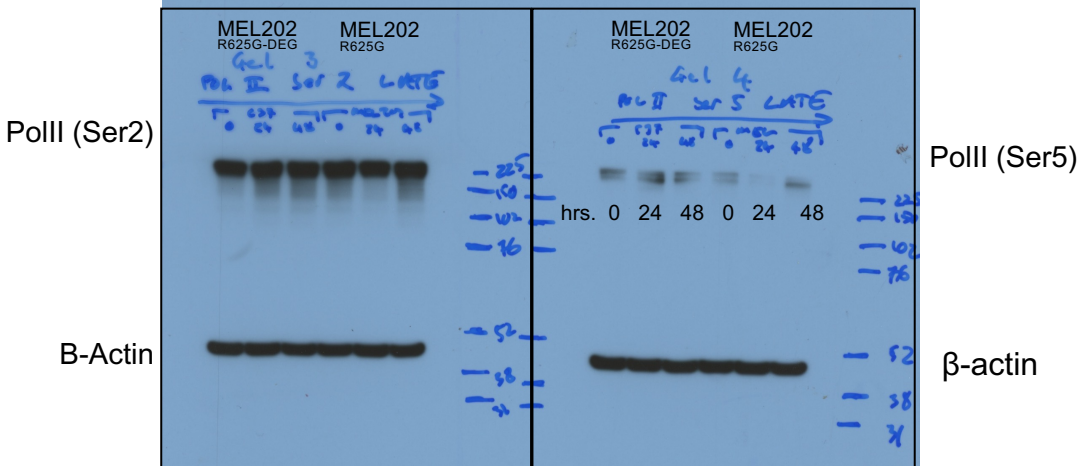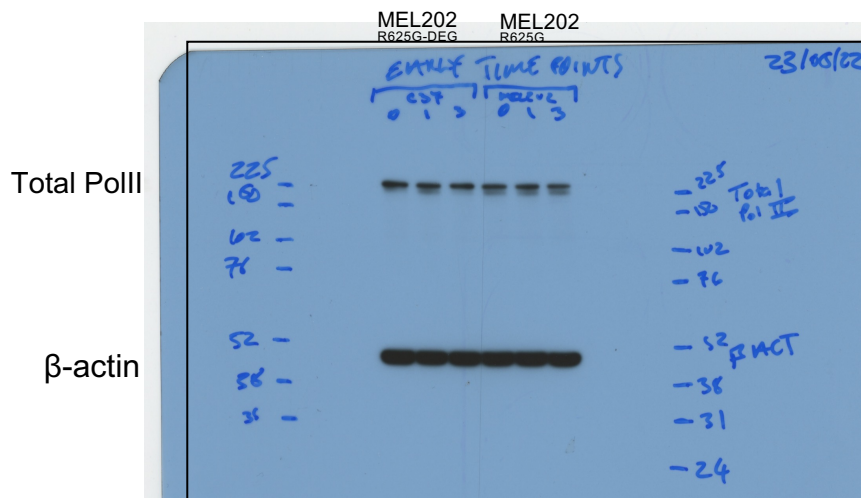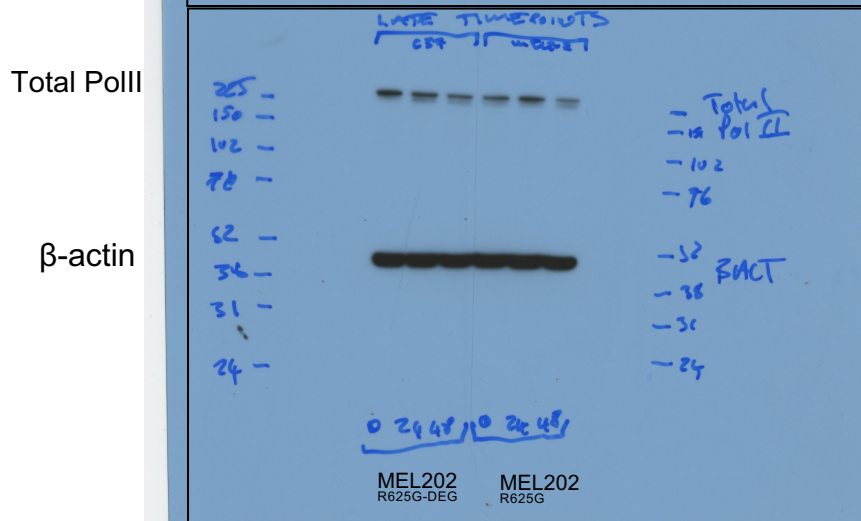

Figure 2f

CINP

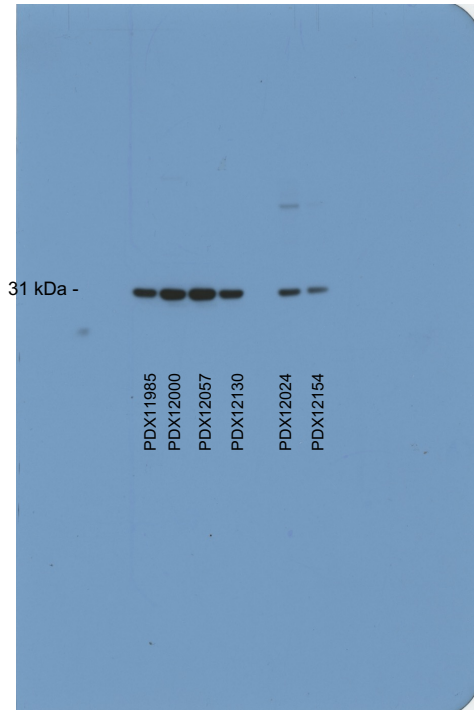

$\beta$ -actin

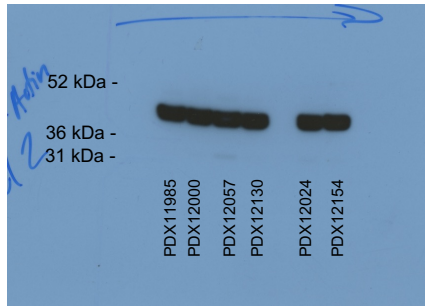

Figure 2h

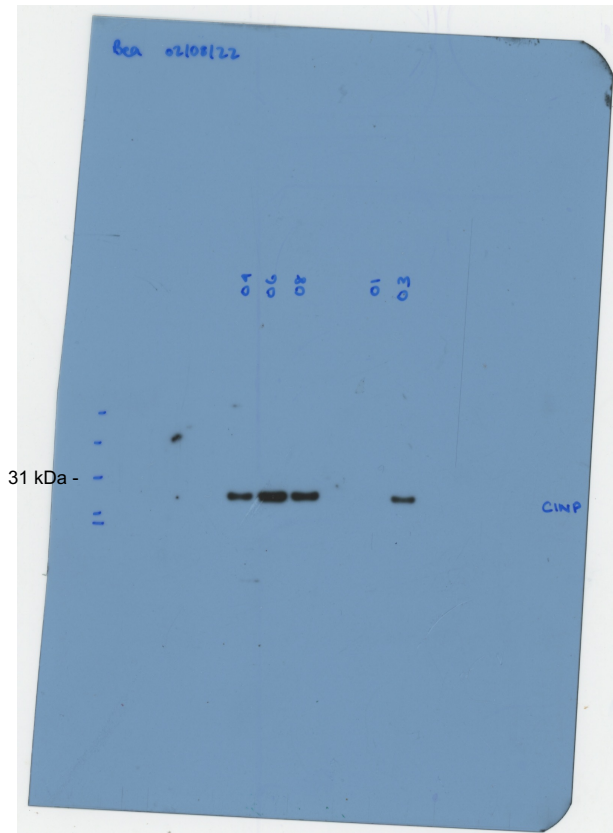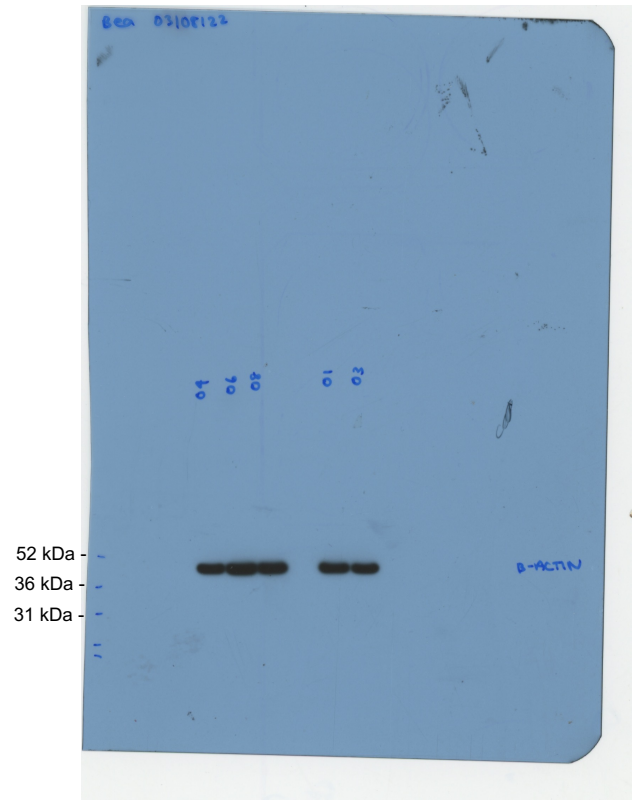

# Extended Data Fig. 4b

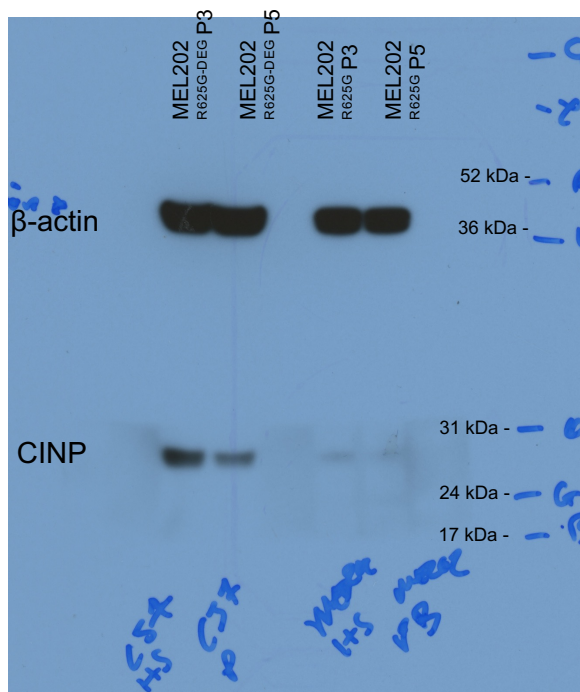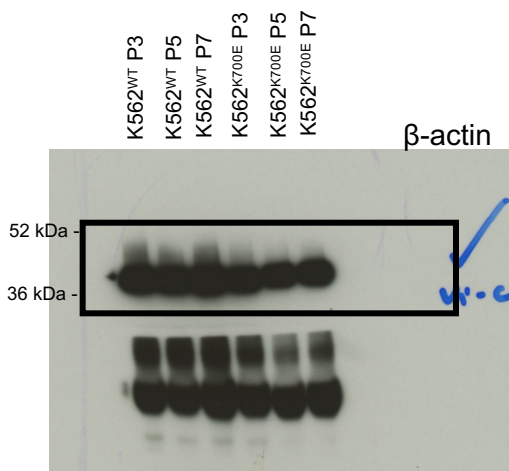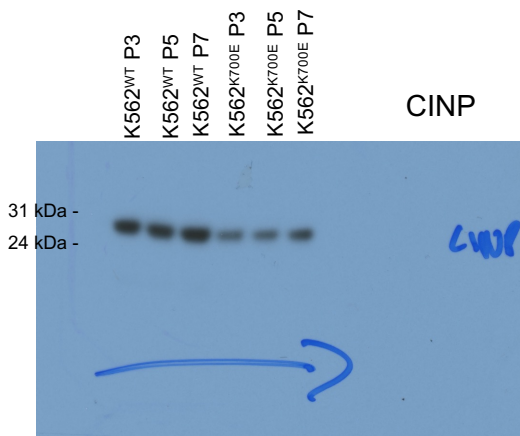

# Extended Data Fig. 4b

CINP MP41

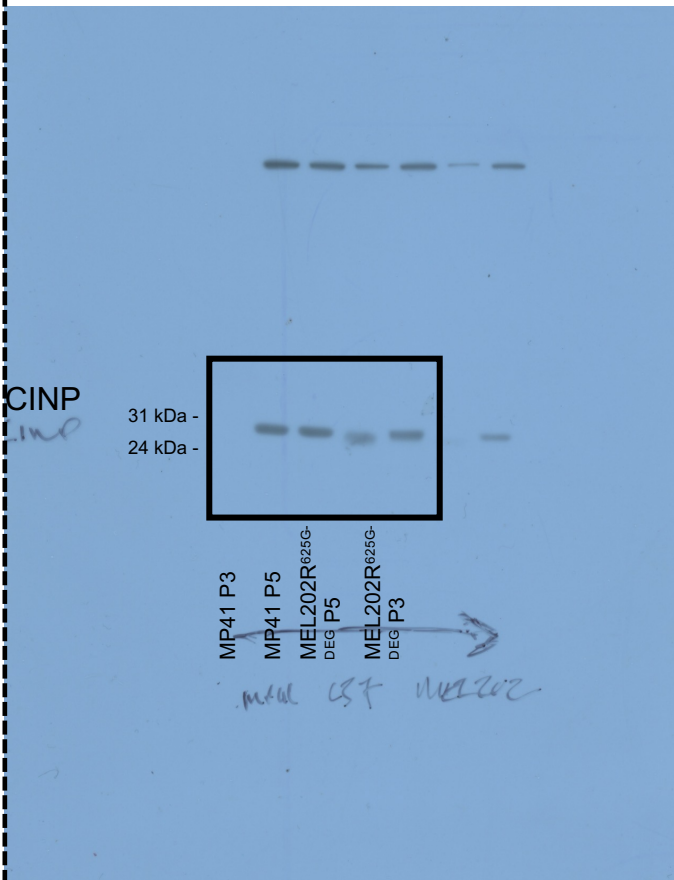

β-actin

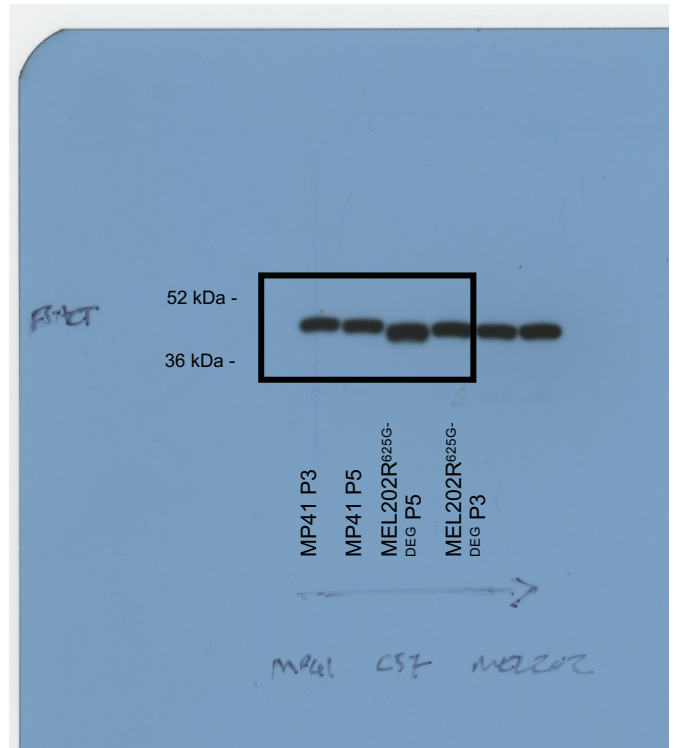

CINP NALM-6 series  
exposure 1

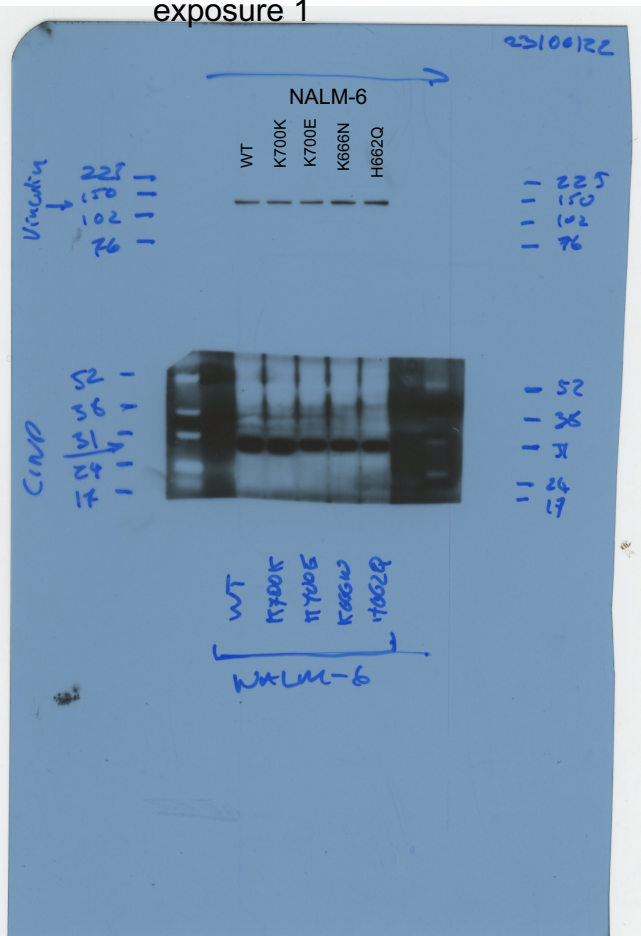

vinculin NALM-6 series exposure used

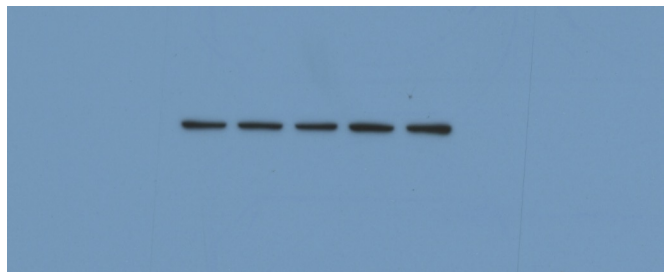

CINP NALM-6 series exposure used

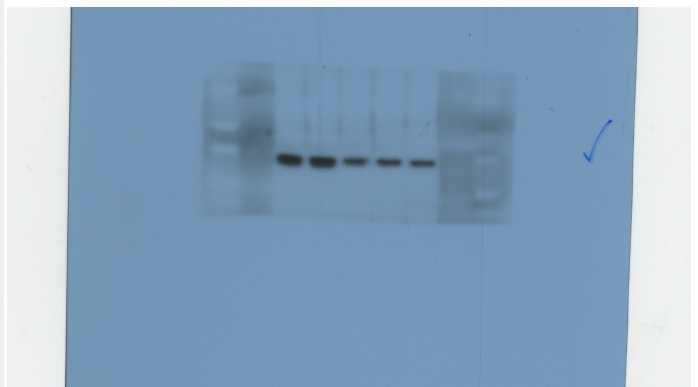

### Extended Data Fig. 4c

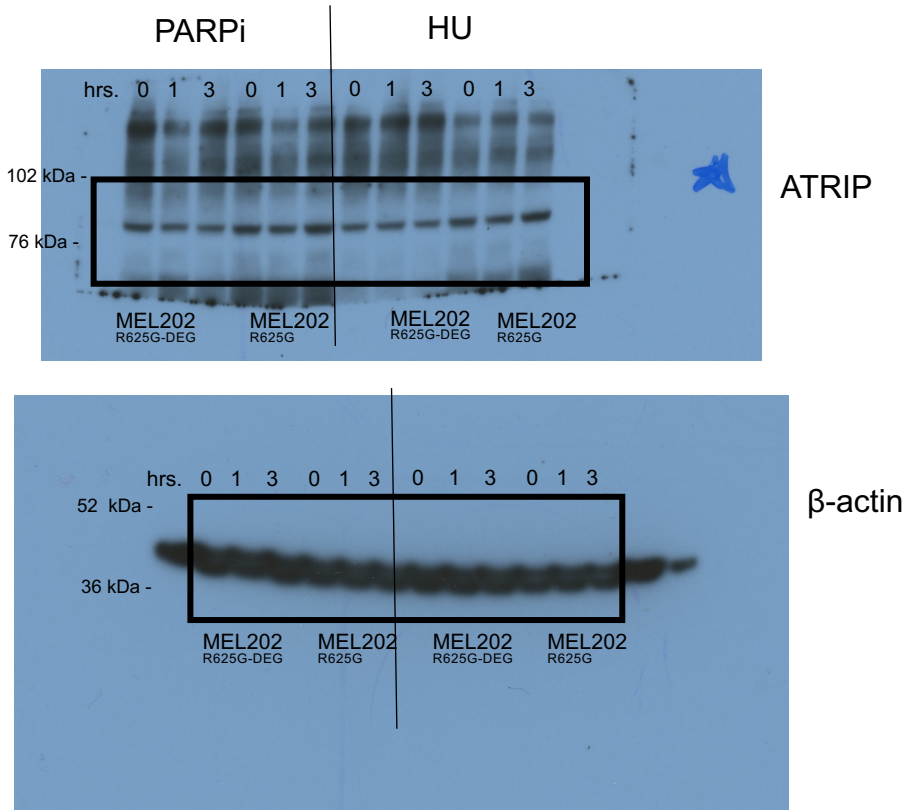

### Extended Data Fig. 4d

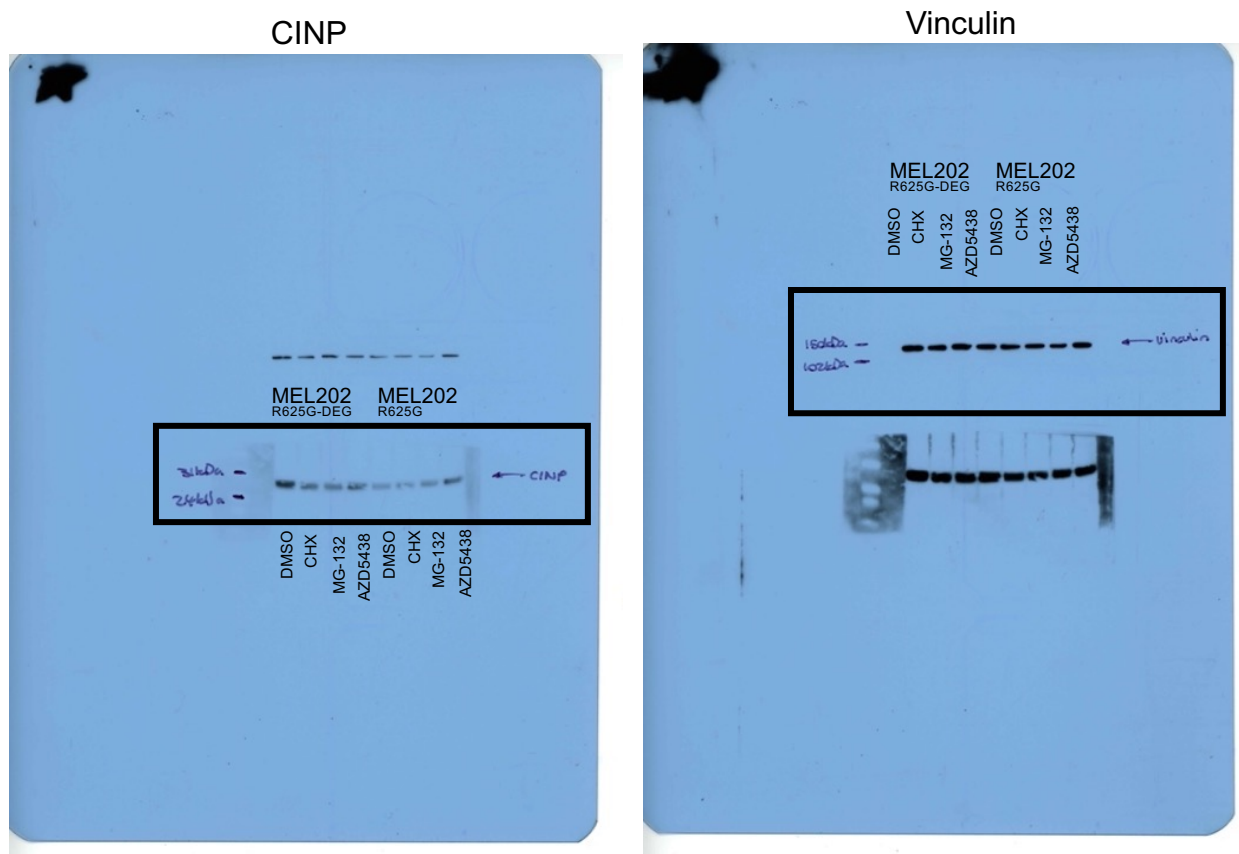

Figure 3e

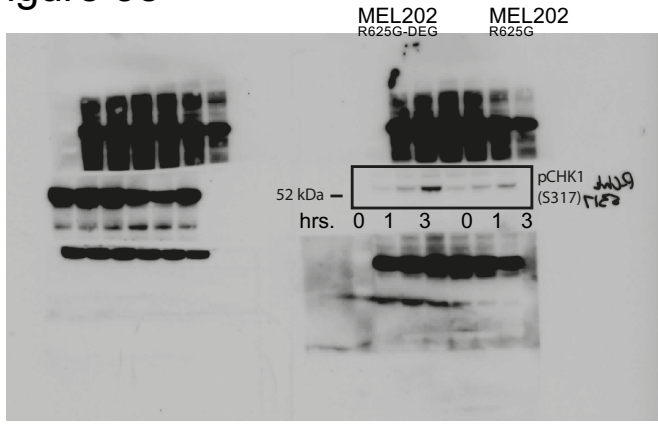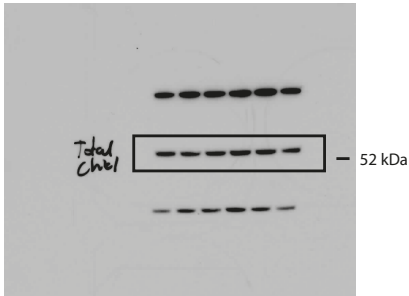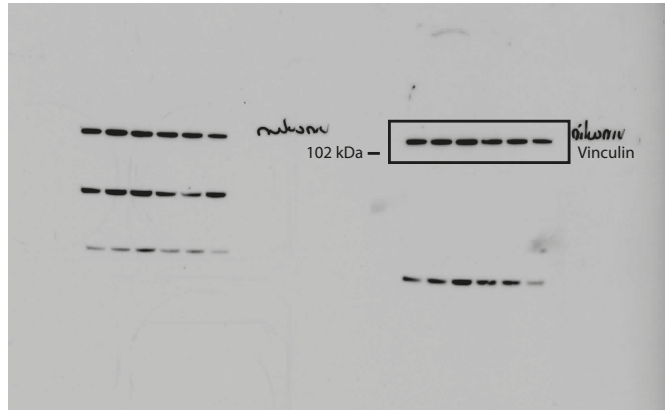

Figure 4a

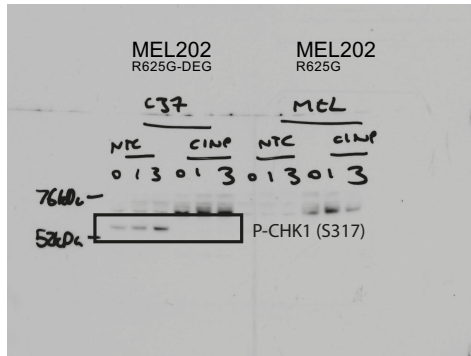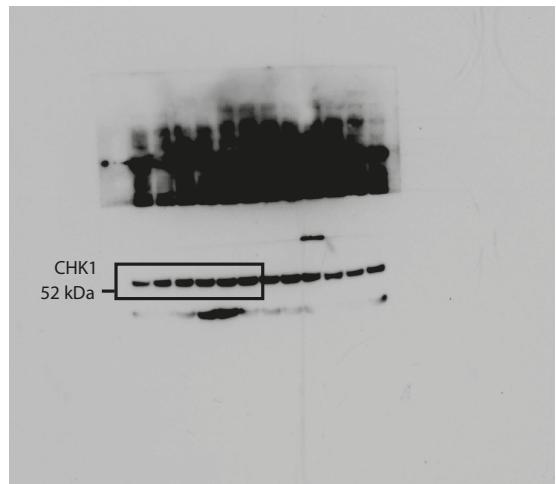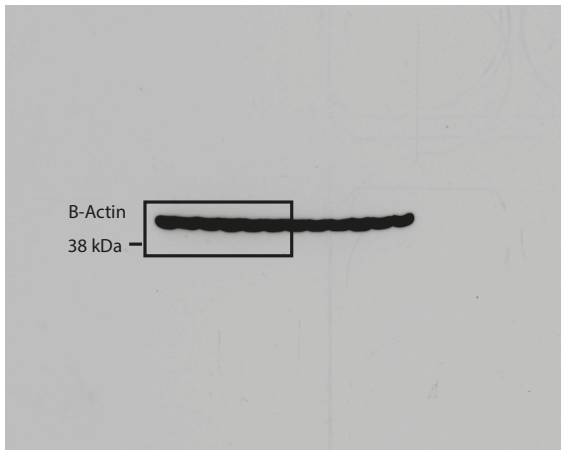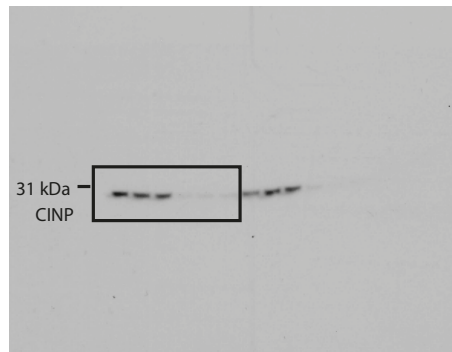



Figure 4c

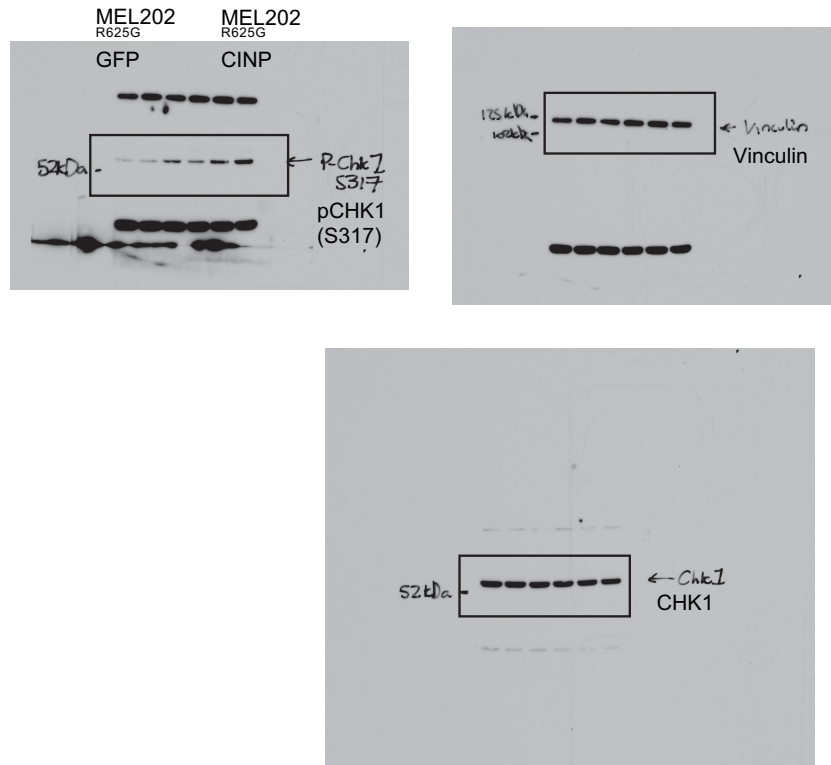

# Extended Data Fig. 5di

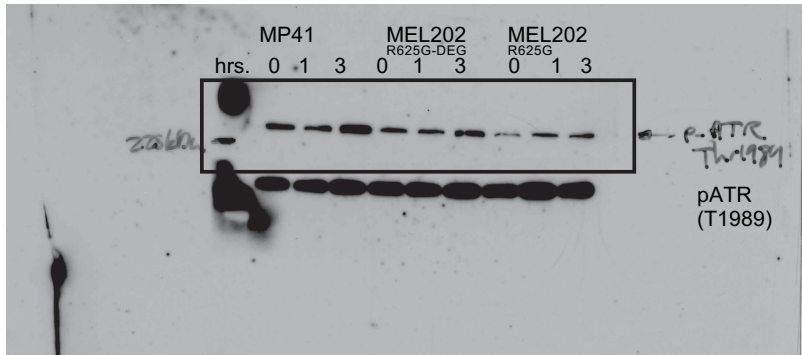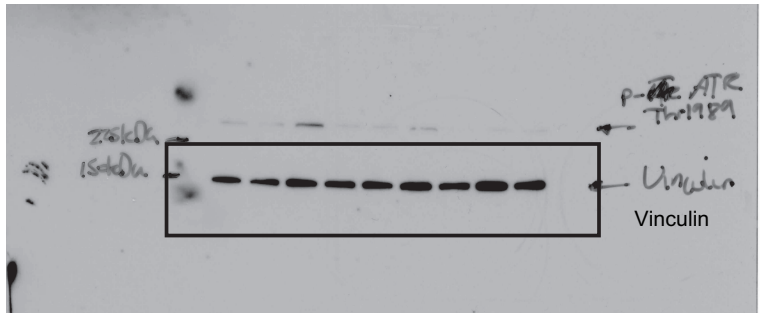

# Extended Data Fig. 5dii

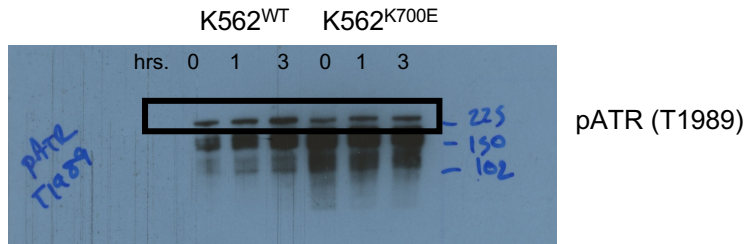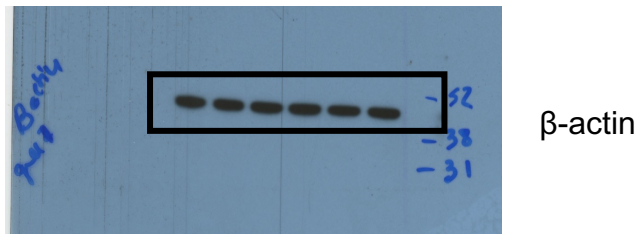

# Extended Data Fig. 4e

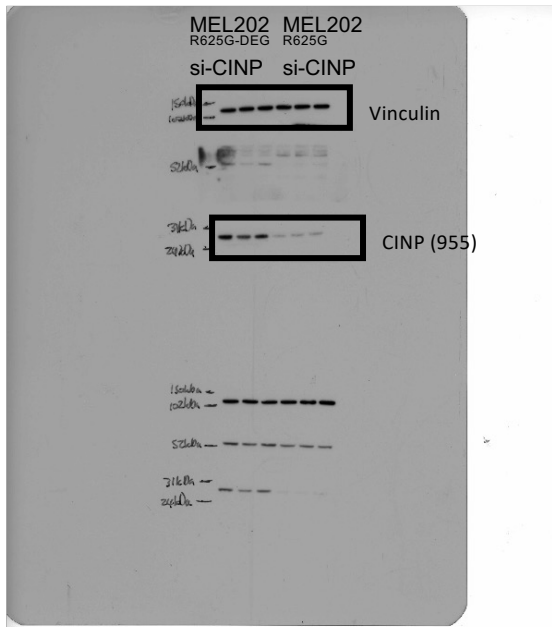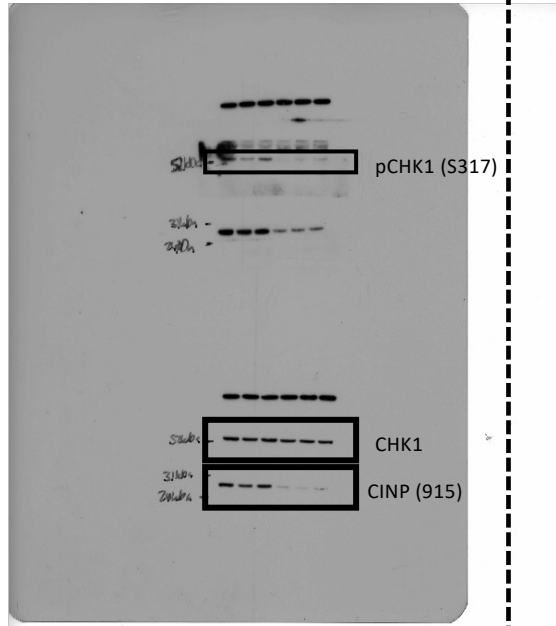

# Extended Data Fig. 6a

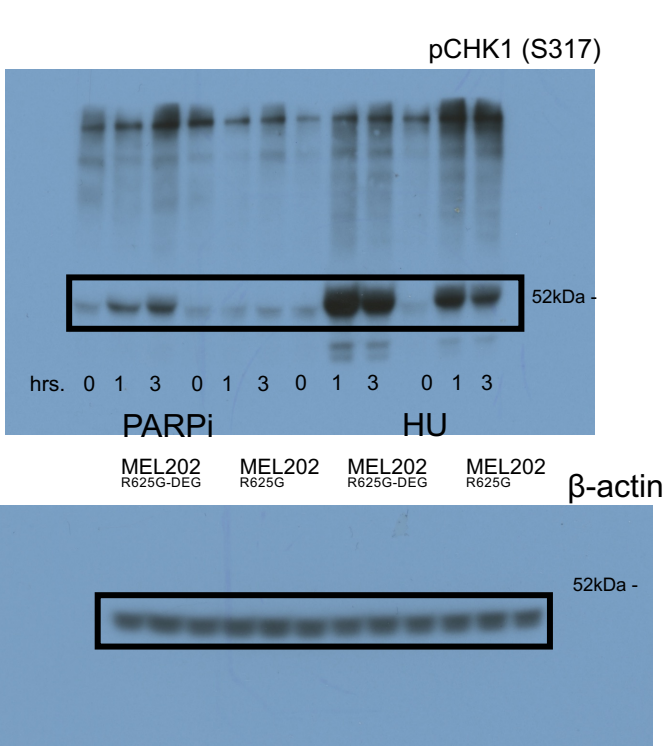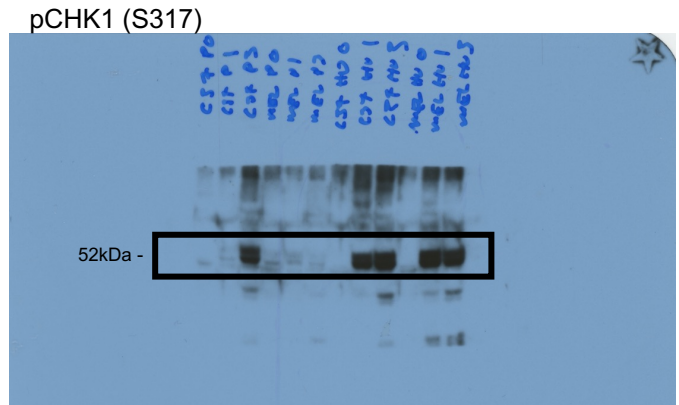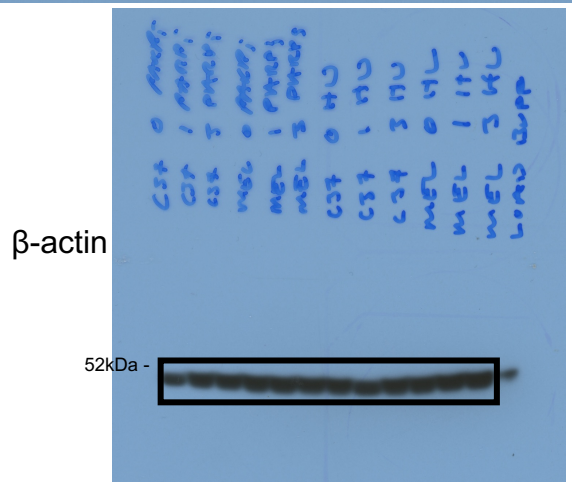

# Extended Data Fig. 6b

PARPi pCHK1 (S317)  
HU

$\beta$ -actin

K562<sup>WT</sup> K562<sup>K700E</sup> K562<sup>WT</sup> K562<sup>K700E</sup>  
hrs. 0 1 3 0 1 3 0 1 3 0 1 3

52kDa -

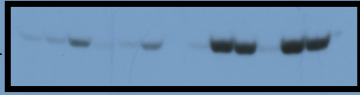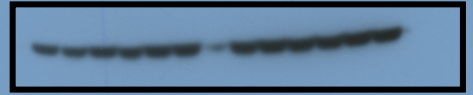

Extended Data Fig. 8d-e

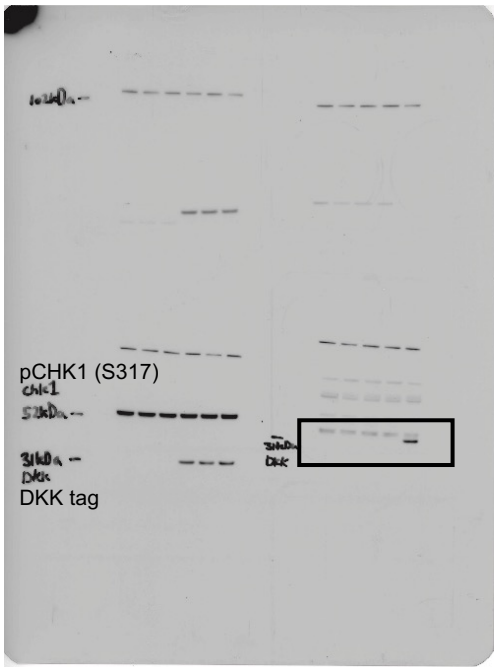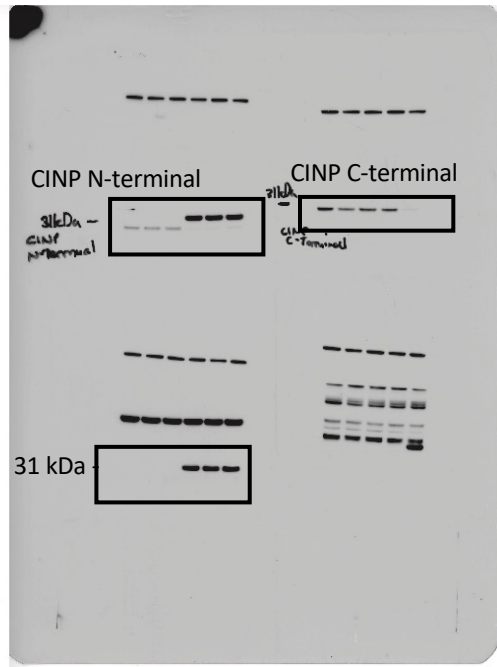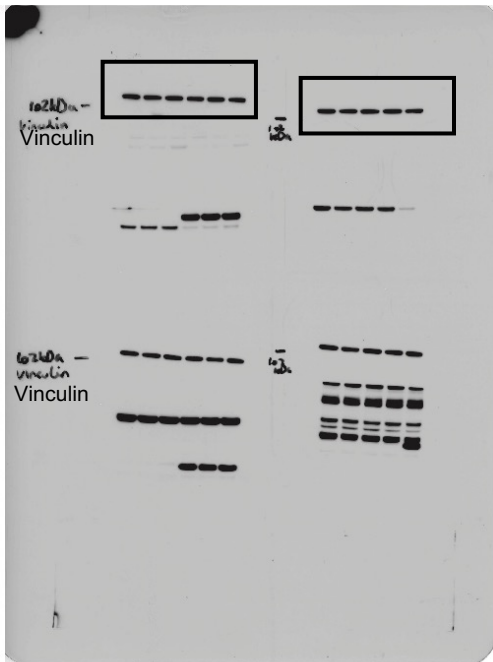

Extended Data Fig. 8h

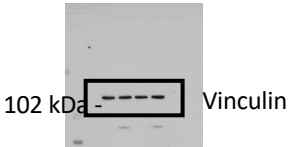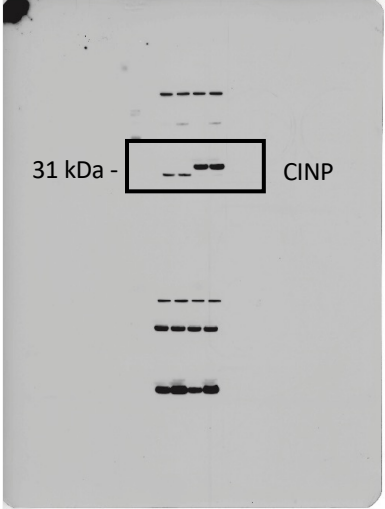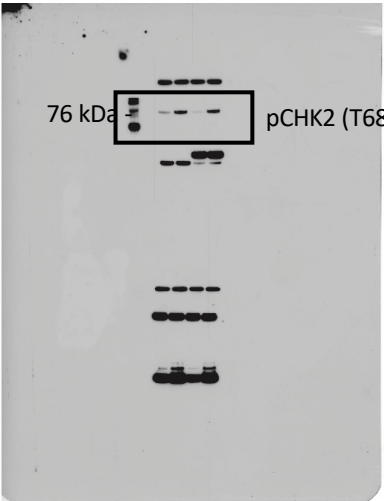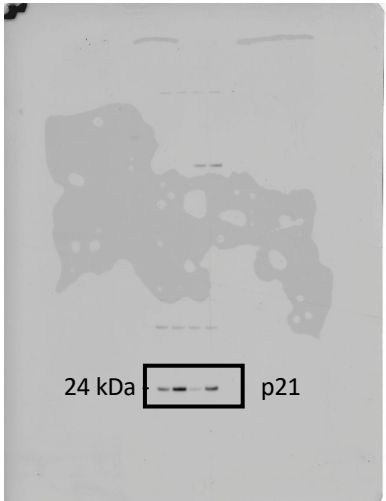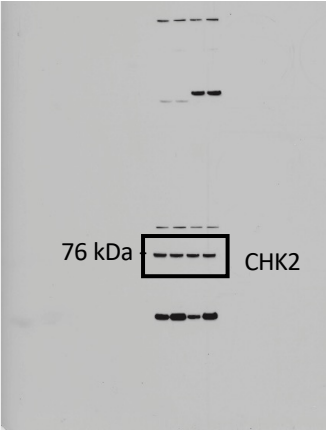

Figure 5b

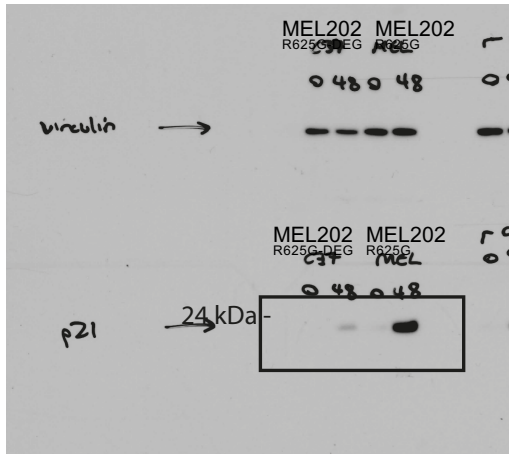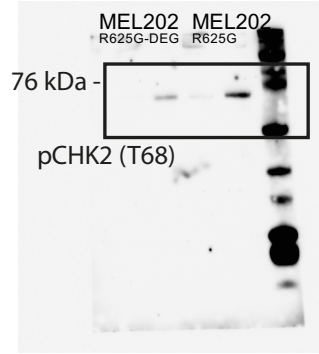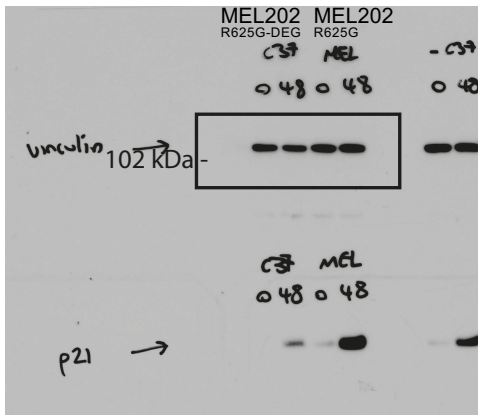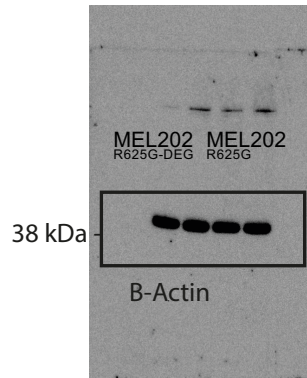

Figure 5d

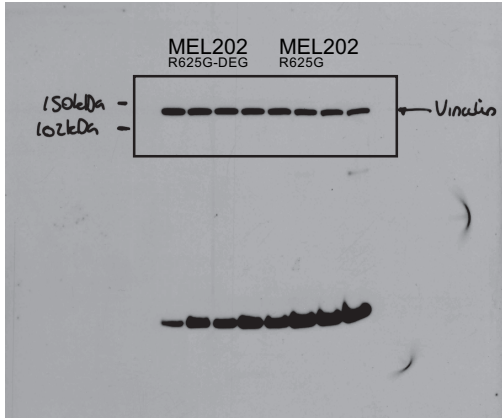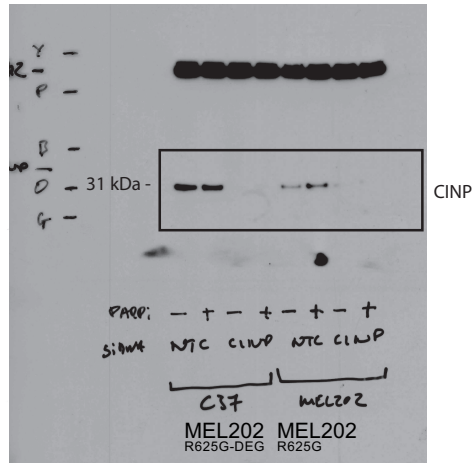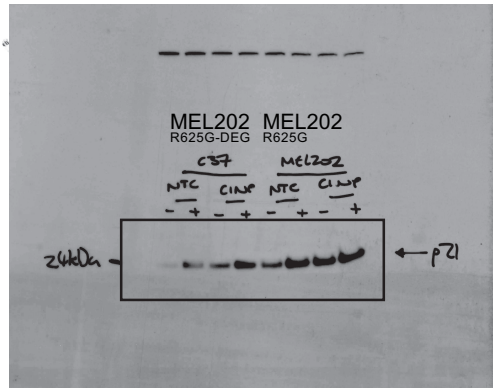



Figure 5e

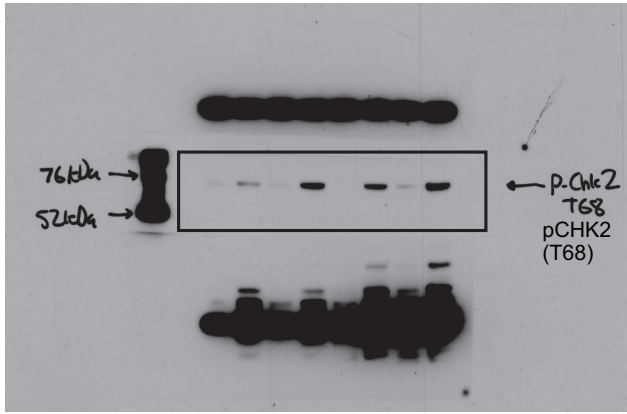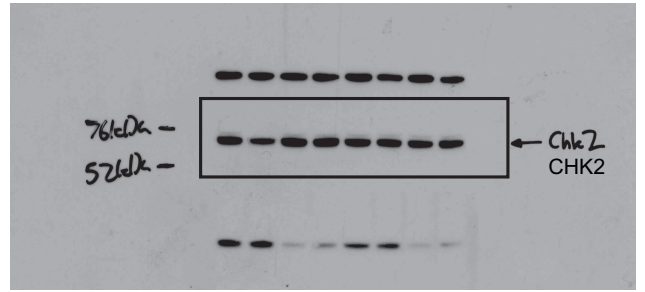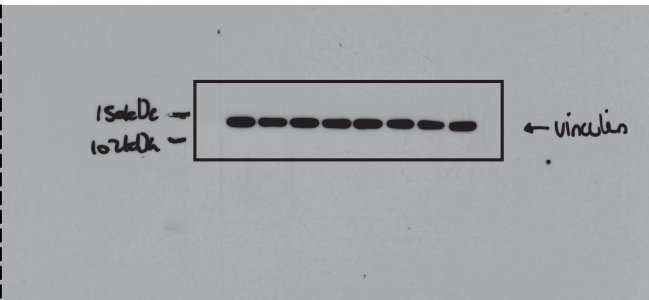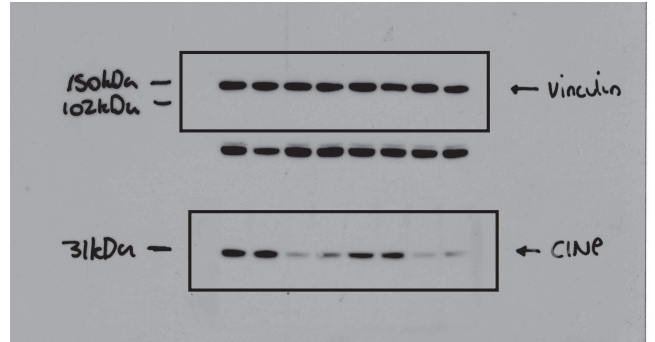

Figure 5g

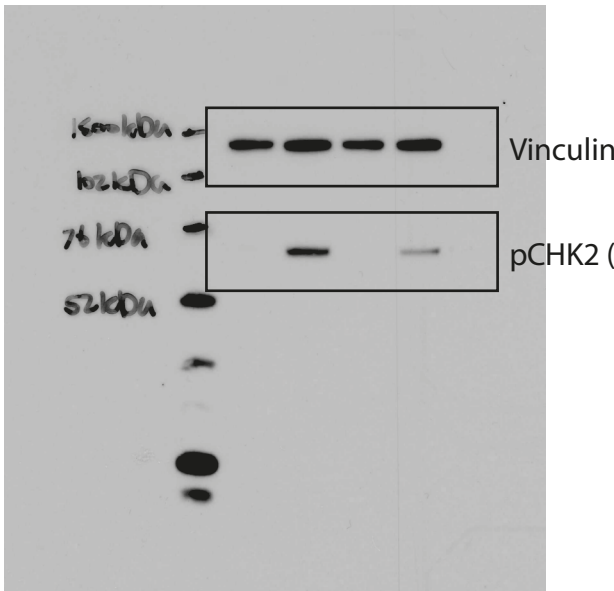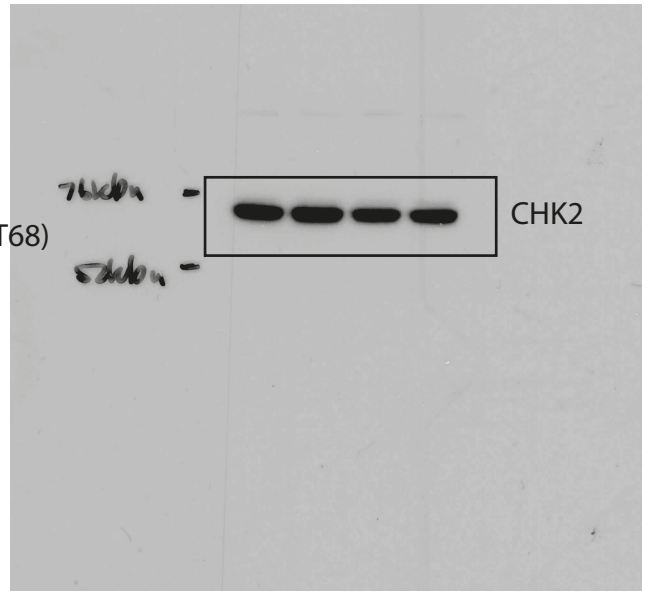

Figure 6b

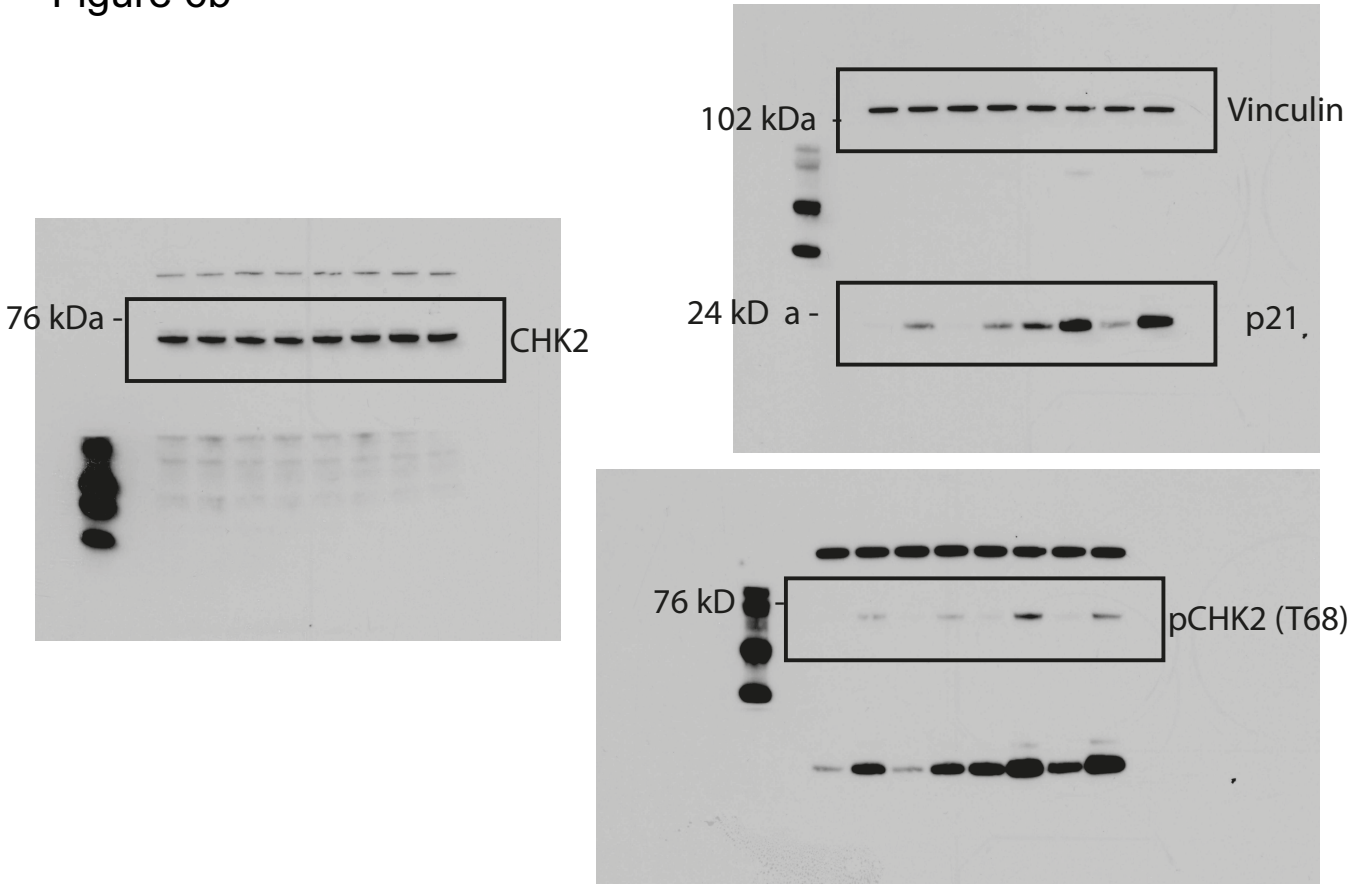

Extended Data Fig. 9c

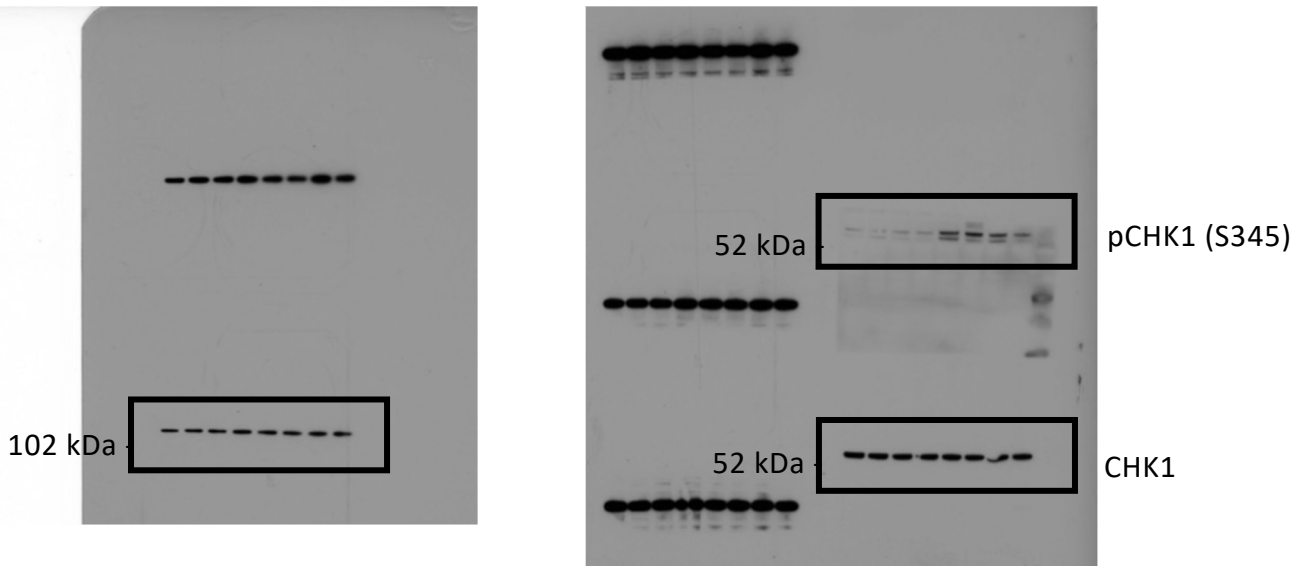

### Extended Data Fig. 9e

pCHK2 (T68)

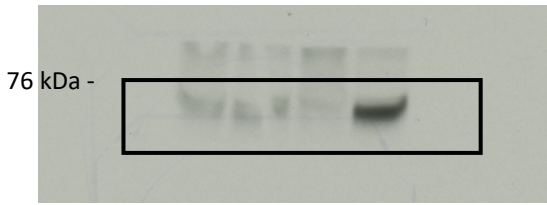

β-actin

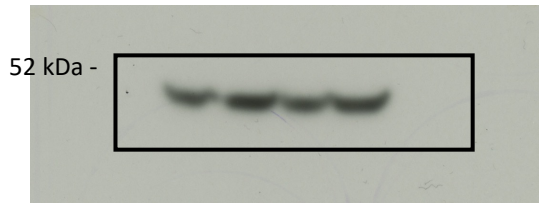

### Extended Data Fig. 9f

pATM (S1981)

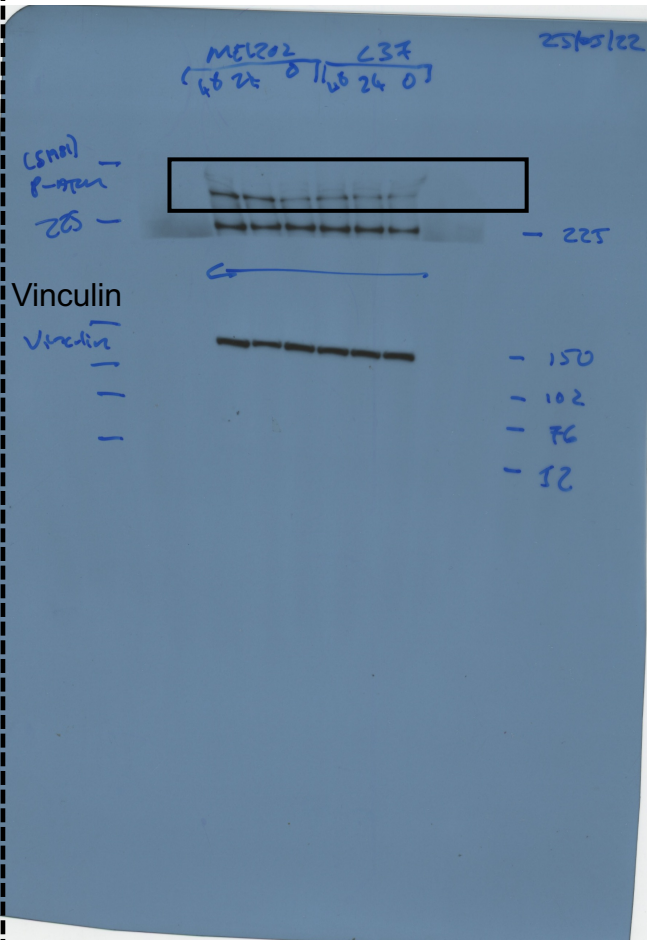

pATM (S1981)

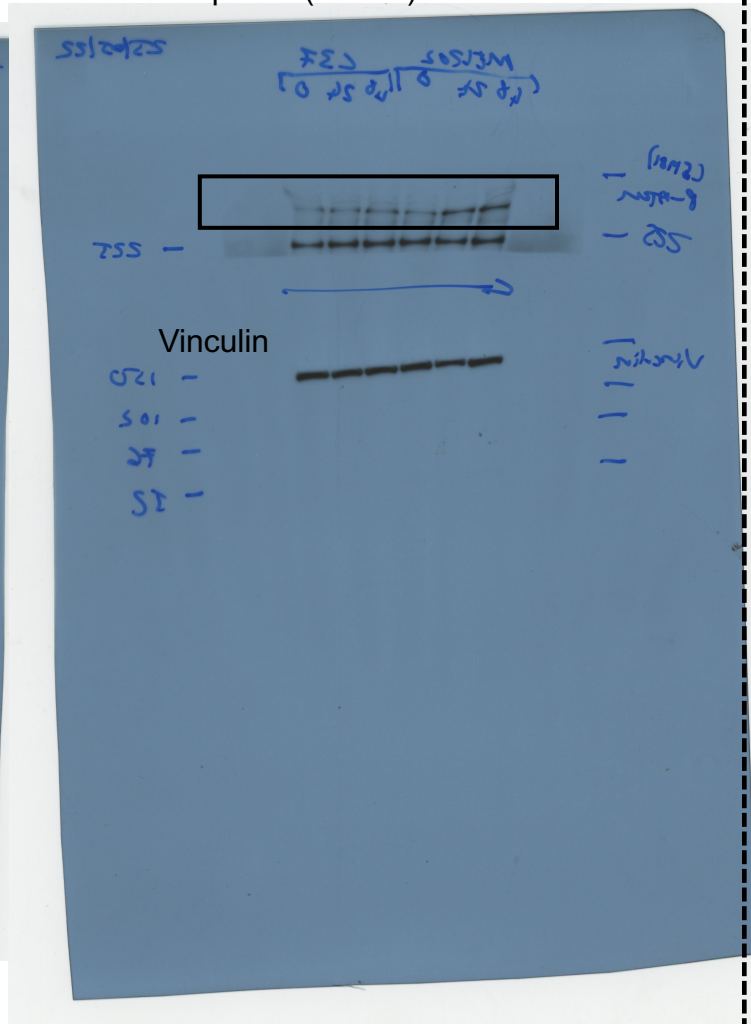

Extended Data Fig. 10d

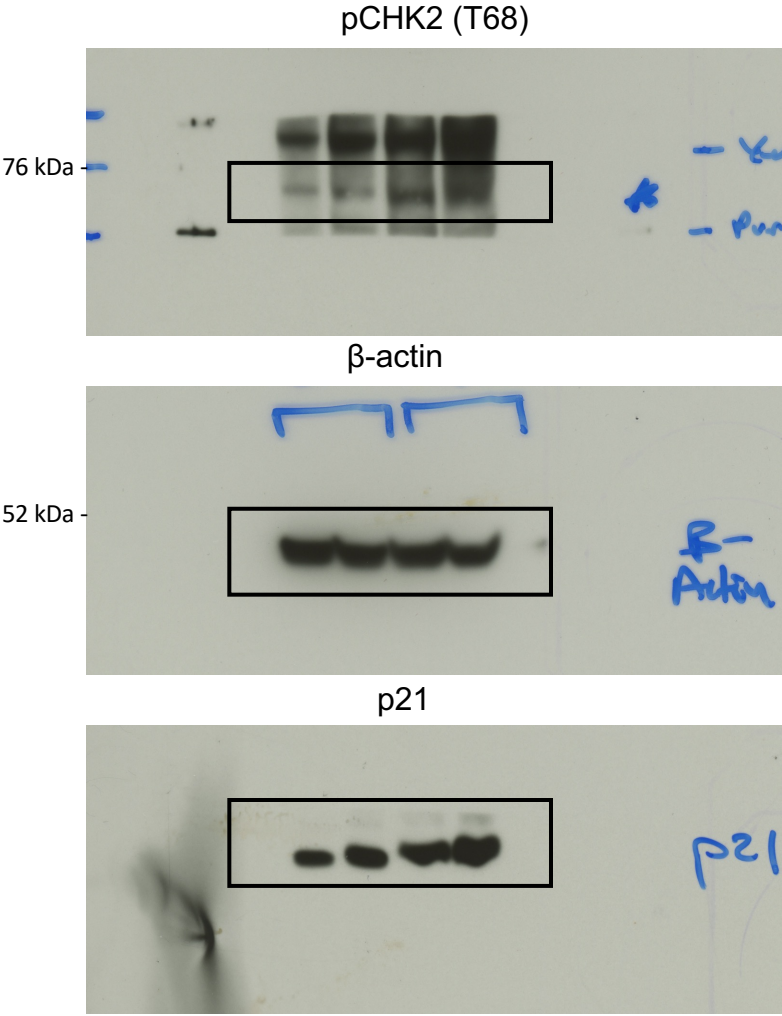

# FACs gating example related to Figure 5a

MEL202<sup>R625G</sup>\_DMSO

BD FACSDiva 8.0.1

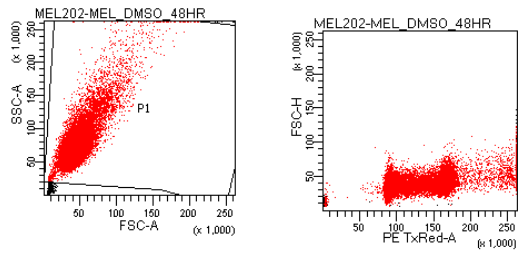

MEL202<sup>R625G</sup>\_PARPi

BD FACSDiva 8.0.1

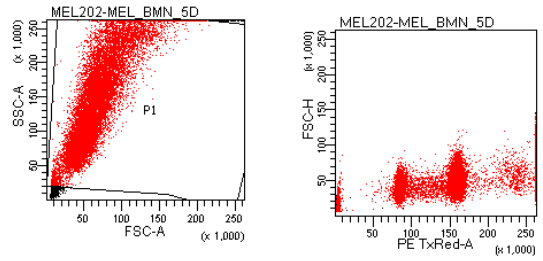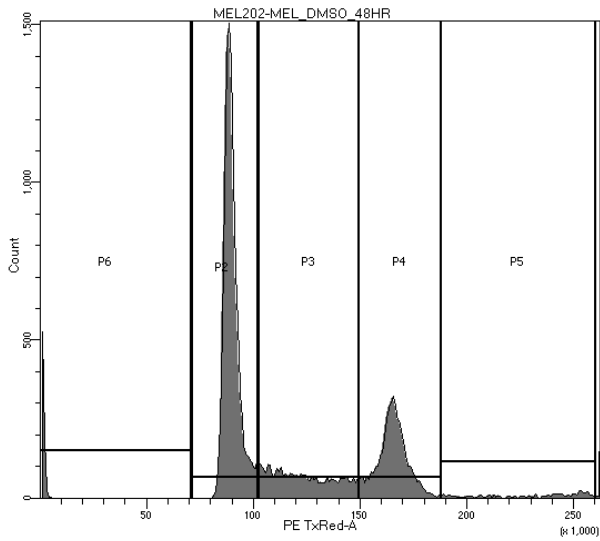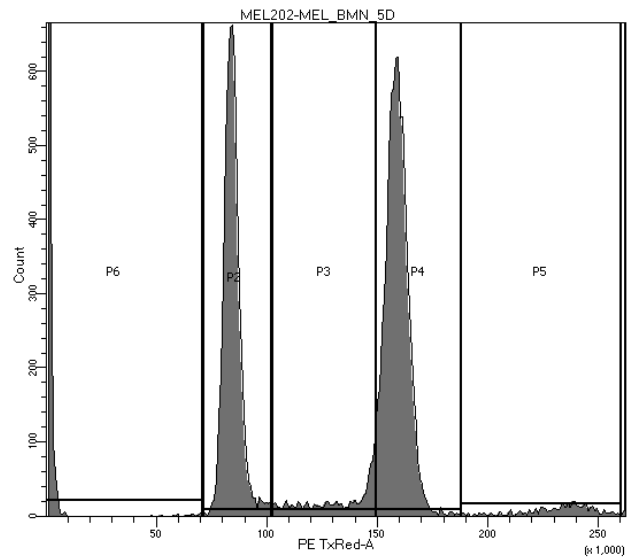

# Fibre images

## related to Figure 3a-d

MEL202<sup>R625G-DEG</sup>

MEL202<sup>R625G</sup>

DMSO

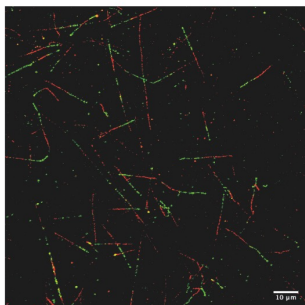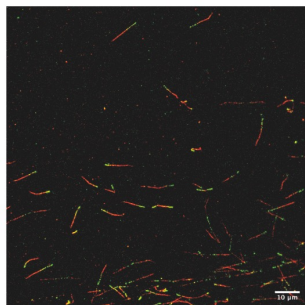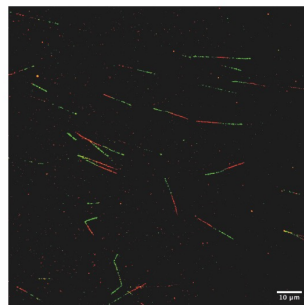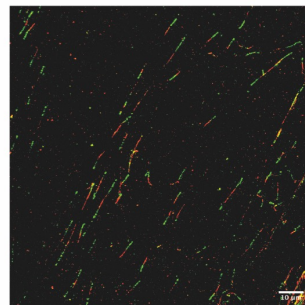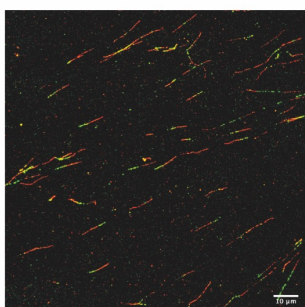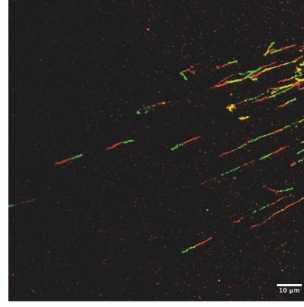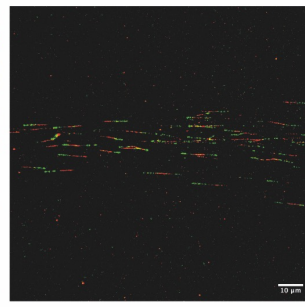

PARPi

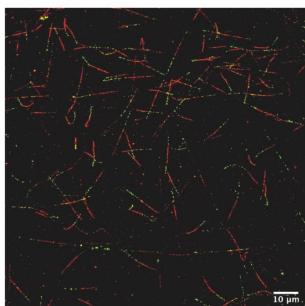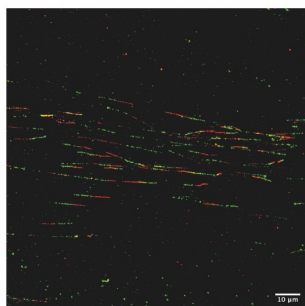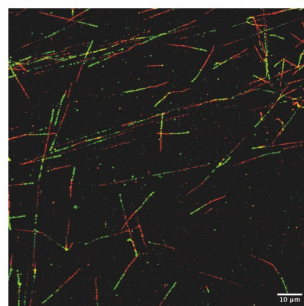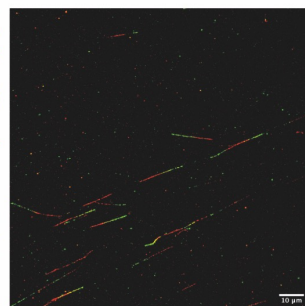

# Fibre images

related to Figure 3a-d

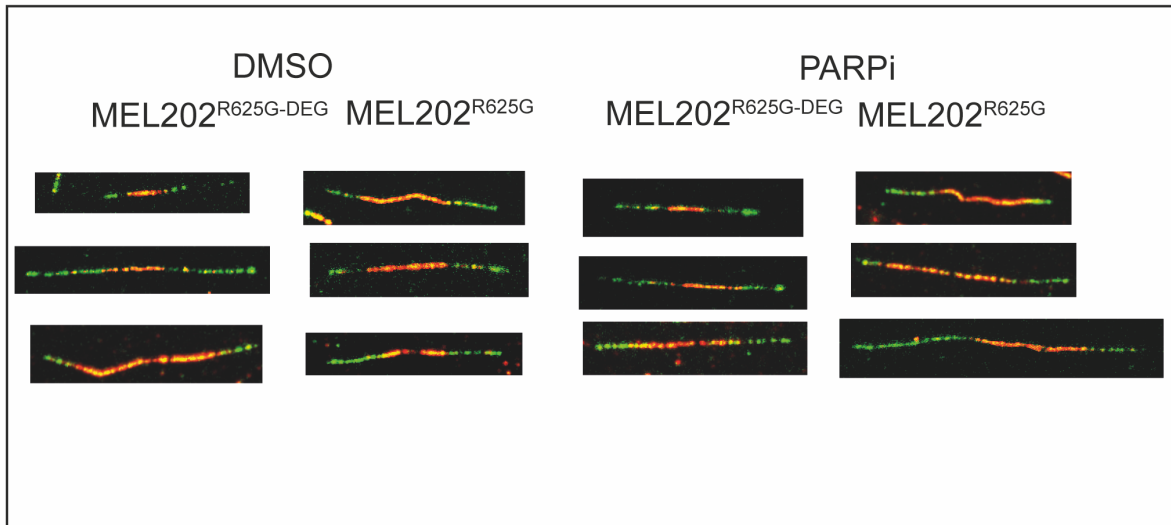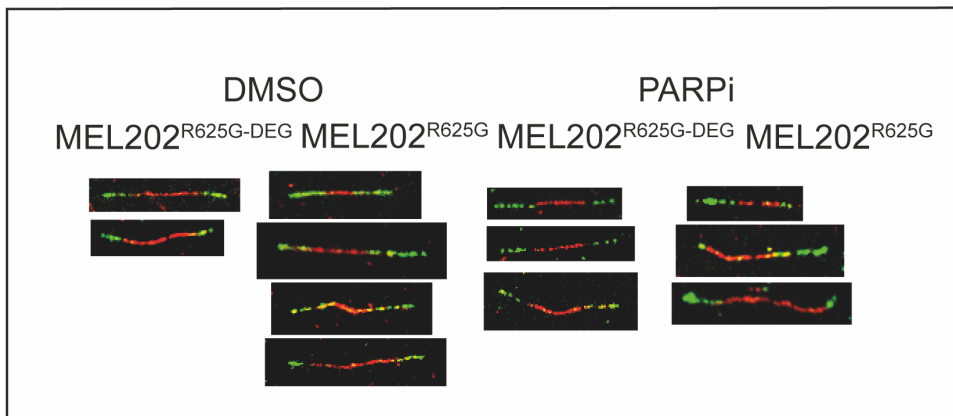

Supplement: 41588_2023_1460_MOESM7_ESM.pdf [file 41588_2023_1460_MOESM7_ESM.pdf]
